# Supplementary material for: Fabrication of stretchable, flexible conductive thermoplastic polyurethane/graphene composites via foaming
Source: Royal Society of Chemistry journal article supplement (doi:10.1039/c5ra12515d), 2015-01-01
Supplement: c5ra12515d1.pdf [file c5ra12515d1.pdf]

## Supporting Information

### Fabrication of Stretchable, Flexible Conductive Thermoplastic Polyurethane/Graphene Composites via Foaming

Yuejuan Chen,<sup>1</sup> Yang Li,<sup>1</sup> Donghua Xu,<sup>2\*</sup> Wentao Zhai<sup>1\*</sup>

*1* Ningbo Key Lab of Polymer Materials, Ningbo Institute of Material Technology and Engineering, Chinese Academy of Sciences, Ningbo, Zhejiang Province, 315201, China. E-mail: [wtzhai@nimte.ac.cn](mailto:wtzhai@nimte.ac.cn)

*2* State Key Lab of Polymer Physics and Chemistry, Changchun Institute of Applied Chemistry, Chinese Academy of Sciences, Changchun 130022, China. E-mail: [dhxu@ciac.ac.cn](mailto:dhxu@ciac.ac.cn)

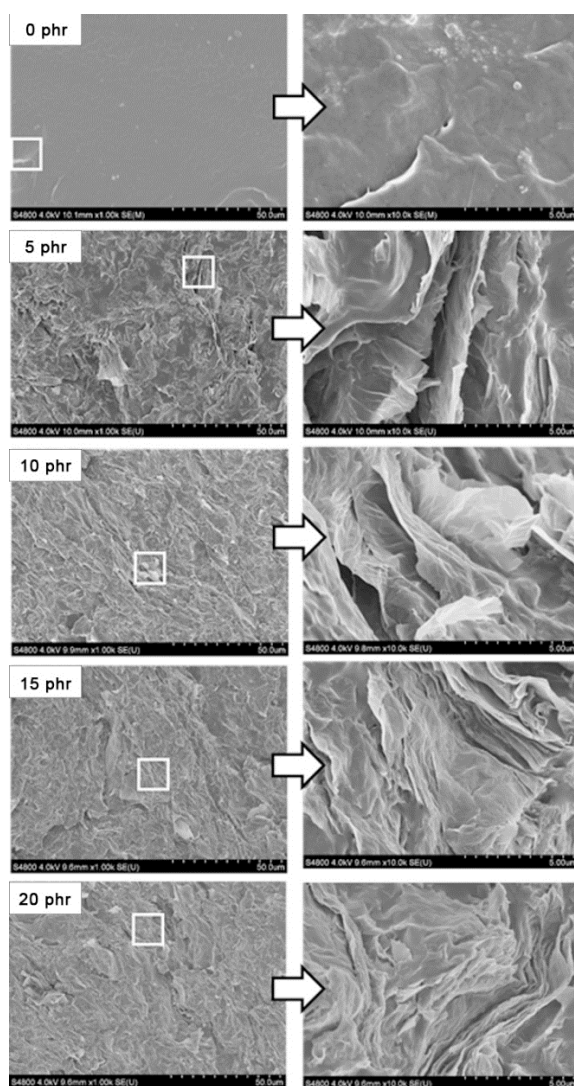

Fig. S1 SEM images of the cross-section of TPUG samples with varying graphene loading of 0, 5, 10, 15 and 20 phr. The images in higher magnification shows the presence of graphene sheets.
